# Supplementary material for: Beyond the Hospital: Family Caregivers' Experiences in Supporting Stroke Recovery in Ghana
Source: Research Square preprint supplement (doi:10.21203/rs.3.rs-8570564/v1), 2026-01-23
Supplement: Supplementary file 1 [file 5c57762dc5ffda1871919d12.docx]

**Supplementary File 1: Semi-Structured Interview Guide**

**Title of Study:**
*Beyond the Hospital: Family Caregivers’ Experiences in Supporting Stroke Recovery in Ghana*

**Target Participants:**
Family caregivers of stroke survivors

**Purpose of the Interview:**
To explore caregivers’ knowledge of stroke, caregiving roles, barriers encountered, and coping strategies while supporting stroke survivors.

**Introductory Script (to be read to participants)**

Thank you for agreeing to take part in this interview. This discussion seeks to understand your experiences as a caregiver of a family member who has suffered a stroke. There are no right or wrong answers. You are free to share as much as you feel comfortable. Your responses will be kept confidential and used only for research purposes. You may stop the interview at any time if you wish.

**SECTION A: Sociodemographic Information**

1. Age
2. Sex
3. Age
4. Marital Status
5. Religion
6. Duration of caregiving

**SECTION B: Knowledge Caregivers Have About Stroke**

1. Can you tell me what you know about stroke?
2. In your opinion, what caused your relative’s stroke?
3. How did you initially react when you realized your relative had a stroke?
4. What signs or symptoms did your relative experience before or during the stroke?
5. Do you know the type of stroke your relative was diagnosed with?
6. Is there anything else you would like to share about your understanding of stroke?

**SECTION C: Caregivers’ Assistance in Daily Living Activities**

1. Please describe how you support your relative to perform daily living activities.
2. What specific daily activities do you assist your relative with?
3. Aside from daily living activities, what other forms of support do you provide (e.g., hospital visits, medication management, emotional support)?

**SECTION D: Barriers Encountered by Caregivers**

1. Which caregiving activities do you find most difficult, and why?
2. How has caring for your relative affected your personal schedule or social activities?
3. How has caregiving affected your work or finances?
4. How has caregiving affected your relationships with family members, friends, or others?
5. Among the challenges you face, which do you consider the most serious, and why?
6. Are there any other difficulties or barriers you experience as a caregiver that you would like to share?

**SECTION E: Coping Strategies Adopted by Caregivers**

1. What helps you cope with or endure the stress involved in caring for your relative?
2. Are there any personal beliefs, practices, or sources of support that help you continue in your caregiving role?

**Closing Question**

1. Is there anything else you would like to tell me about your experience as a caregiver of a stroke survivor?

**End of Interview**

Thank you very much for your time and for sharing your experiences.
